# Supplementary material for: CMR-based T1-mapping offers superior diagnostic value compared to longitudinal strain-based assessment of relative apical sparing in cardiac amyloidosis
Source: PubMed Central journal article supplement (PMC8324782; doi:10.1038/s41598-021-94650-2), 2021-07-30
Supplement: 41598_2021_94650_MOESM1_ESM.pdf [file 41598_2021_94650_MOESM1_ESM.pdf]

**CMR-based T1-mapping offers superior diagnostic value compared to longitudinal strain-based assessment of relative apical sparing in cardiac amyloidosis**

<sup>1\*</sup>Dennis Korthals, <sup>1\*</sup>Grigorios Chatzantonis, <sup>1</sup>Michael Bietenbeck, <sup>1</sup>Claudia Meier, <sup>1</sup>Philipp Stalling and <sup>1</sup>Ali Yilmaz

<sup>1</sup>Department of Cardiology I; University Hospital Münster; Münster, Germany

\*: Both authors contributed equally to this work.

# T1- / ECV-mapping

Like almost every other cvi42 circle user, we perform T1-/ECV-mapping according to the following steps. Further information can be found in the cvi42 manual or in the manual of the respective software provider.

1. Load native (T1n) and post-contrast series (T1e) in the respective module.
2. Draw endo- (green) and epicardial (red) contours as well as a blood (orange) contour and a marker for RV-Insertion (blue dot).

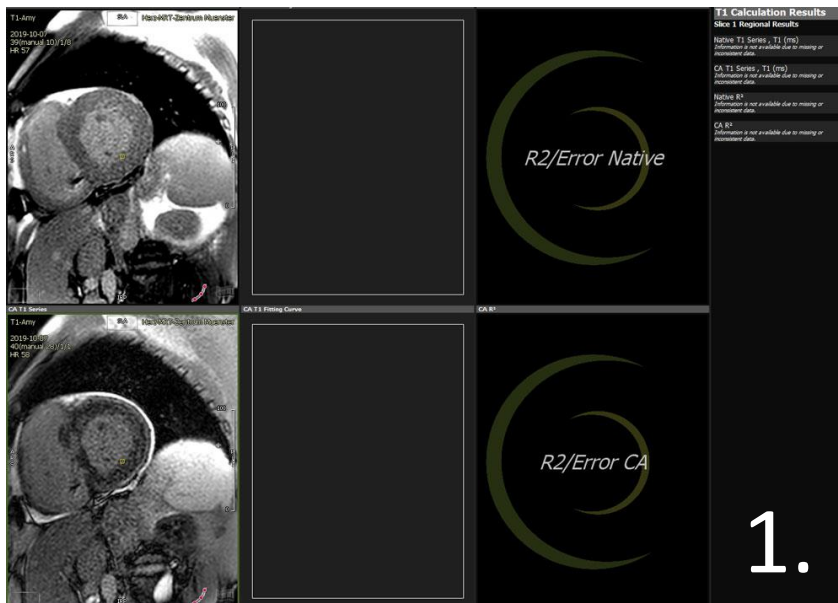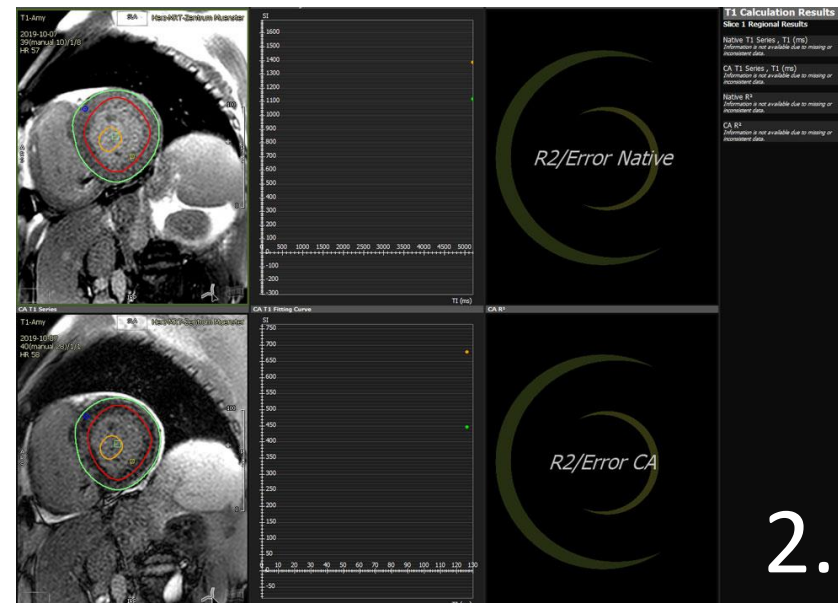

# T1- / ECV-mapping

3. Forward the contours to all single images in T1n and T1e sequences.
4. Check for coarsely mismatched contours/myocardium and correct manually.

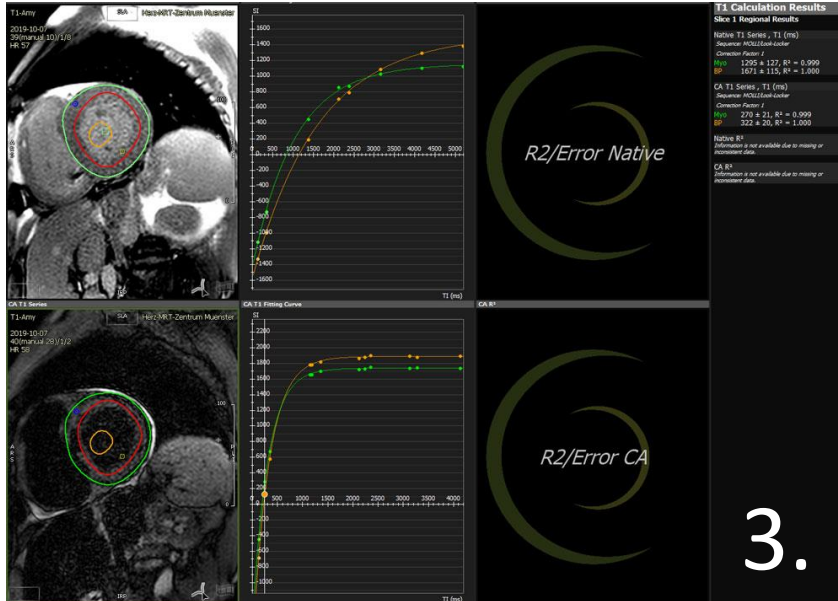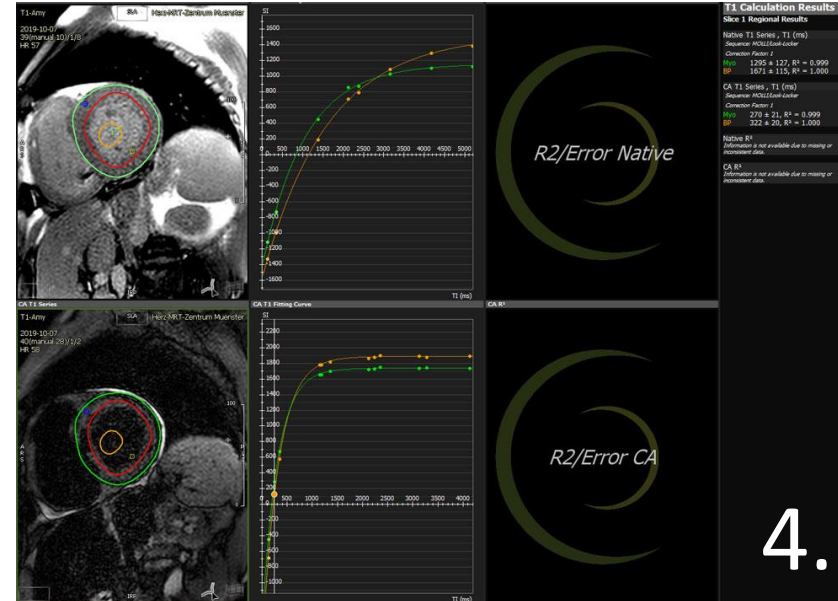

# T1- / ECV-mapping

5. Register T1n- and T1e-images.
6. Generate T1n- and T1e-maps – copy contours.

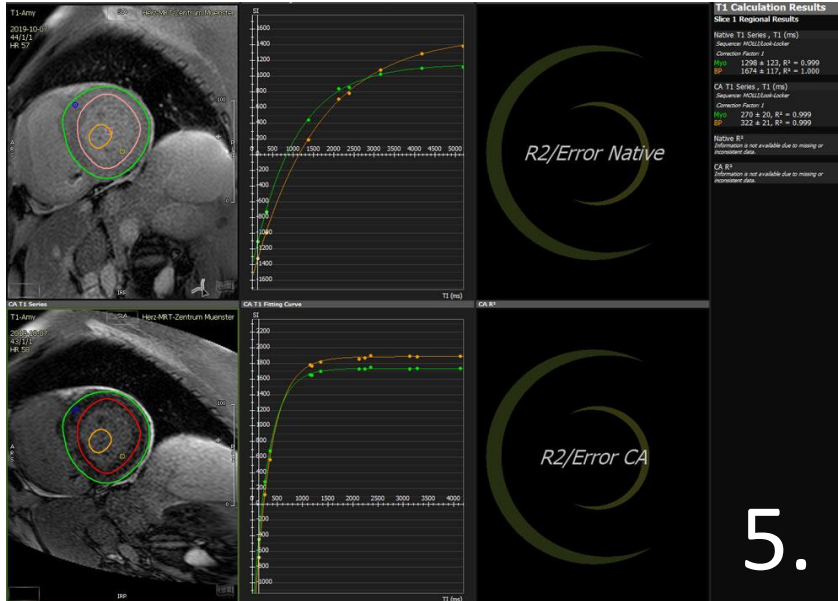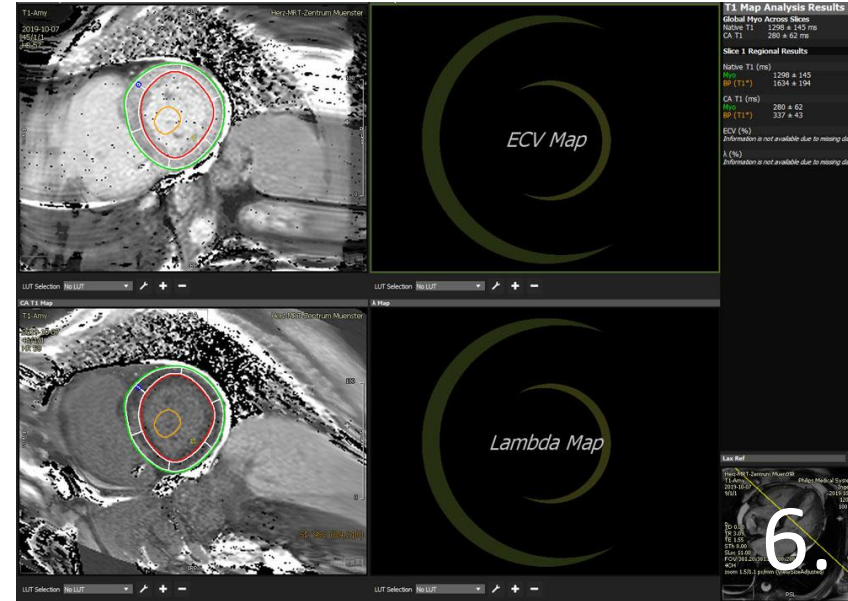

# T1- / ECV-mapping

7. Enter recent hematocrit.
8. Calculate ECV-maps.

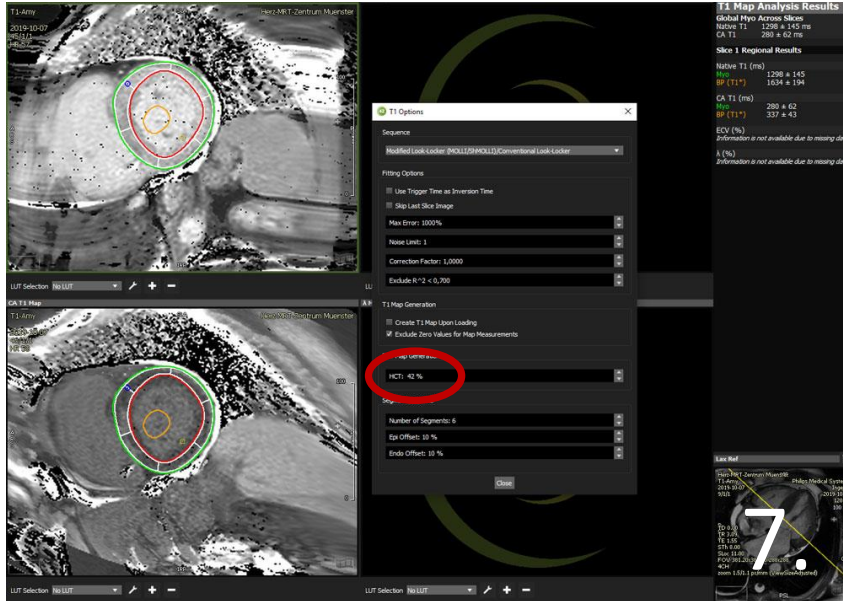

T1n-map

ECV map

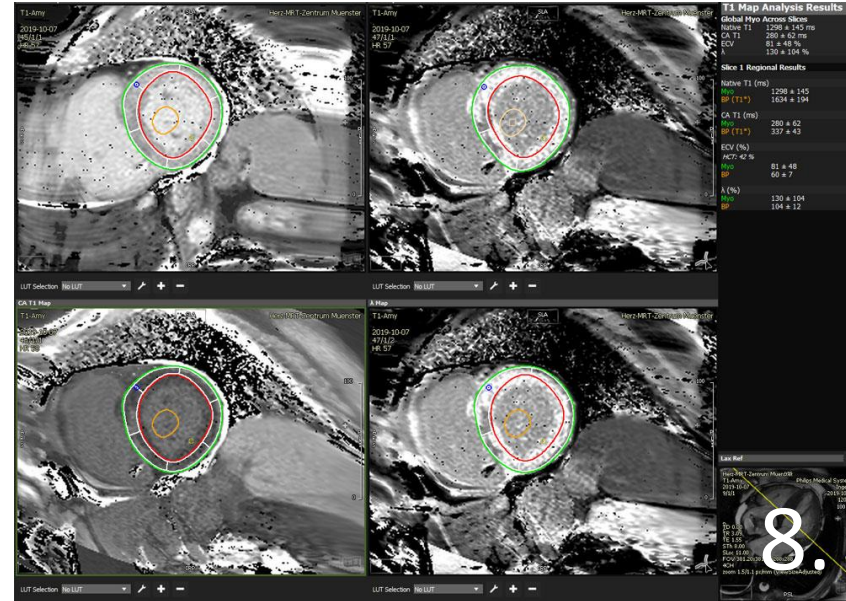

T1e-map

Global:  
T1n: 1298 ms  
T1e: 280 ms  
ECV: 81 %
